# Supplementary material
Source: PubMed Central journal article supplement (PMC7242635)
Supplement: mmc1.pdf [file mmc1.pdf]

## Diffusing Capacity of Carbon Monoxide in Assessment of COPD

*Aparna Balasubramanian, MD; Neil R. MacIntyre, MD; Robert J. Henderson, MS; Robert L. Jensen, PhD; Gregory Kinney, MPH, PhD; William W. Stringer, MD; Craig P. Hersh, MD, MPH; Russell P. Bowler, MD, PhD; Richard Casaburi, PhD, MD; MeiLan K. Han, MD; Janos Porszasz, MD, PhD; R. Graham Barr, MD, DrPH; Barry J. Make, MD; Robert A. Wise, MD; and Meredith C. McCormack, MD, MHS*

CHEST 2019; 156(6):1111-1119

*Online supplements are not copyedited prior to posting and the author(s) take full responsibility for the accuracy of all data.*

© 2019 AMERICAN COLLEGE OF CHEST PHYSICIANS. Reproduction of this article is prohibited without written permission from the American College of Chest Physicians. See online for more details. DOI: 10.1016/j.chest.2019.06.035

**e-Table 1.** Baseline characteristics and outcomes of participants missing % emphysema (%LAA<sub>-950</sub>)

| Characteristic                                                        | Total<br>(N=1806) | Analysis<br>(N=1564) | Missing<br>(N=242) |
|-----------------------------------------------------------------------|-------------------|----------------------|--------------------|
| Age                                                                   | 68 (62, 74)       | 68 (62, 74)          | 68 (63, 74)        |
| Male, N (%)                                                           | 984 (54%)         | 841 (54%)            | 143 (59%)          |
| Black, N (%)                                                          | 356 (20%)         | 281 (18%)            | 75 (31%)           |
| Education, N (%)                                                      |                   |                      |                    |
| High school, no diploma                                               | 143 (8%)          | 117 (7%)             | 26 (11%)           |
| High school graduate or GED                                           | 442 (24%)         | 379 (24%)            | 63 (26%)           |
| Some college or technical school, no degree                           | 537 (30%)         | 467 (30%)            | 70 (29%)           |
| College or technical school graduate (Bachelor's or Associate degree) | 498 (28%)         | 437 (28%)            | 61 (25%)           |
| Master's or doctoral degree                                           | 186 (10%)         | 164 (10%)            | 22 (9%)            |
| BMI, kg/m <sup>2</sup>                                                | 27 (24, 31)       | 28 (24, 31)          | 27 (23, 31)        |
| Obese (BMI≥30), N (%)                                                 | 589 (33%)         | 519 (33%)            | 70 (29%)           |
| Anemia, N (%)                                                         | 240 (13%)         | 197 (13%)            | 43 (18%)           |
| Diabetes, N (%)                                                       | 282 (16%)         | 249 (16%)            | 33 (14%)           |
| Congestive Heart Failure, N (%)                                       | 76 (4%)           | 60 (4%)              | 16 (7%)            |
| Sleep Apnea, N (%)                                                    | 312 (17%)         | 280 (18%)            | 32 (13%)           |
| Pack years of smoking                                                 | 45 (34, 63)       | 45 (34, 63)          | 46 (35, 62)        |
| Smoking Status, N (%)                                                 |                   |                      |                    |
| Former smoker                                                         | 558 (31%)         | 484 (31%)            | 74 (31%)           |
| Current to former smoker*                                             | 229 (13%)         | 191 (12%)            | 38 (16%)           |
| Current smoker                                                        | 1019 (56%)        | 889 (57%)            | 130 (54%)          |
| FEV <sub>1</sub> percent predicted                                    | 69 (50, 89)       | 70 (51, 89)          | 64 (42, 83)        |
| DLCO percent predicted                                                | 65 (49, 81)       | 66 (50, 82)          | 57 (42, 74)        |
| ≤ 50%, N(%)                                                           | 479 (27%)         | 388 (25%)            | 91 (38%)           |
| KCO percent predicted                                                 | 72 (57, 87)       | 73 (58, 87)          | 67 (51, 83)        |
| ≤ 50%, N(%)                                                           | 304 (17%)         | 246 (16%)            | 58 (24%)           |
| CAT                                                                   | 13 (7, 20)        | 13 (7, 20)           | 16 (8, 22)         |
| SGRQ                                                                  | 29 (13, 46)       | 28 (13, 45)          | 35 (16, 53)        |
| SF-36 Physical                                                        | 42 (33, 50)       | 42 (33, 50)          | 39 (31, 49)        |
| SF-36 Mental                                                          | 55 (46, 60)       | 55 (46, 60)          | 55 (45, 60)        |
| 6MWD (feet)                                                           | 1260 (982, 1500)  | 1280 (1000, 1512)    | 1180 (800, 1432)   |
| %LAA <sub>-950</sub> <sup>†</sup>                                     | 4 (1, 14)         | 4 (1, 14)            | -                  |
| LAA <sub>-950</sub> >5%, N (%) <sup>†</sup>                           | 741 (47%)         | 741 (47%)            | -                  |
| Airway Wall Thickness                                                 | 1.1 (0.9, 1.2)    | 1.1 (0.9, 1.2)       | 1.1 (0.9, 1.3)     |
| TLC (L)                                                               | 5.8 (4.9, 6.9)    | 5.8 (4.9, 6.9)       | 5.2 (4.1, 6.3)     |
| Resting oxygen saturation %                                           | 96 (94, 97)       | 96 (94, 97)          | 96 (94, 98)        |

Values are median (interquartile range) unless otherwise specified. *BMI*: body mass index; *FEV<sub>1</sub>*: Forced expiratory volume in 1 second; *DLCO*: Diffusion capacity of the lung for carbon monoxide; *KCO*: gas transfer efficiency coefficient; *CAT*: COPD Assessment Test; *SGRQ*: St. George's Respiratory Questionnaire; *SF-36*: Short Form 36-item survey; *6MWD*: six-minute walk distance; %LAA<sub>-950</sub>: percent low attenuation areas ≤ -950 Hounsfield units consistent with emphysema; *TLC*: total lung capacity, estimated on CT scan

\*Current to former smoker refers to the participants who went from being current smokers at the Phase I visit to former smokers by the Phase II visit.

† %LAA<sub>-950</sub> characteristics are reported among the subset of participants with available HRCT data, N=1576.

Online supplements are not copyedited prior to posting and the author(s) take full responsibility for the accuracy of all data.

**e-Table 2.** Respiratory outcomes by DLCO and FEV<sub>1</sub> without adjustment for emphysema (%LAA-950)

| Outcome                    | DLCO % predicted                |         | FEV <sub>1</sub> % predicted    |         |
|----------------------------|---------------------------------|---------|---------------------------------|---------|
|                            | Regression Coefficient (95% CI) | p-value | Regression Coefficient (95% CI) | p-value |
| CAT score                  | 0.55 (0.4, 0.7)                 | <.001   | 1.14 (0.98, 1.3)                | <.001   |
| SGRQ score                 | 2.01 (1.58, 2.43)               | <.001   | 3.2 (2.84, 3.57)                | <.001   |
| Activity                   | 3.17 (2.56, 3.79)               | <.001   | 4.28 (3.82, 4.73)               | <.001   |
| Impact                     | 1.55 (1.14, 1.96)               | <.001   | 2.54 (2.12, 2.96)               | <.001   |
| Symptom                    | 1.29 (0.71, 1.87)               | <.001   | 3.39 (3.03, 3.75)               | <.001   |
| SF-36 Physical Function    | -0.92 (-1.13, -0.71)            | <.001   | -1.32 (-1.59, -1.06)            | <.001   |
| SF-36 Mental               | -0.06 (-0.36, 0.24)             | 0.676   | -0.14 (-0.39, 0.12)             | 0.291   |
| 6MWD (feet)                | -52.03 (-62.83, -41.24)         | <.001   | -42.72 (-48.25, -37.18)         | <.001   |
| Resting SpO <sub>2</sub> % | -0.25 (-0.39, -0.12)            | <.001   | -0.18 (-0.23, 0.13)             | <.001   |

Total population (n=1806) was utilized in this analysis. Associations are per 10% decrease in percent predicted DLCO or percent predicted FEV<sub>1</sub>. Models include age, sex, BMI categories, ethnicity, education, smoking pack years, smoking status, anemia status, diabetes status, congestive heart failure status, sleep apnea status, % predicted FEV<sub>1</sub>, and % predicted DLCO. 95% CI: 95% confidence interval; CAT: COPD Assessment Test; SGRQ: St. George's Respiratory Questionnaire; SF-36: Short Form 36-item survey; 6MWD: six-minute walk distance; SpO<sub>2</sub> %: oxygen saturation

**e-Table 3.** Respiratory outcomes by KCO and FEV<sub>1</sub> with adjustment for emphysema (%LAA-950)

| Outcome                    | KCO % predicted                 |         | FEV <sub>1</sub> % predicted    |         |
|----------------------------|---------------------------------|---------|---------------------------------|---------|
|                            | Regression Coefficient (95% CI) | p-value | Regression Coefficient (95% CI) | p-value |
| CAT score                  | 0.59 (0.39, 0.79)               | <.001   | 1.31 (1.1, 1.51)                | <.001   |
| SGRQ score                 | 1.6 (1.15, 2.05)                | <.001   | 3.39 (3.05, 3.74)               | <.001   |
| Activity                   | 2.26 (1.46, 3.07)               | <.001   | 4.68 (4.22, 5.14)               | <.001   |
| Impact                     | 1.23 (0.8, 1.65)                | <.001   | 2.6 (2.24, 2.95)                | <.001   |
| Symptom                    | 1.68 (1.2, 2.16)                | <.001   | 3.7 (3.35, 4.05)                | <.001   |
| SF-36 Physical Function    | -0.72 (-1.05, -0.39)            | <.001   | -1.53 (-1.81, -1.24)            | <.001   |
| SF-36 Mental               | -0.21 (-0.55, 0.13)             | 0.220   | -0.02 (-0.33, 0.33)             | 0.920   |
| 6MWD (feet)                | -35.66 (-47.6, -23.73)          | <.001   | -55.3 (-60.61, -49.99)          | <.001   |
| Resting SpO <sub>2</sub> % | -0.18 (-0.36, 0)                | 0.045   | -0.25 (-0.34, -0.16)            | <.001   |

Total population (n=1564) was utilized in this analysis. Associations are per 10% decrease in percent predicted KCO or percent predicted FEV<sub>1</sub>. Models include age, sex, BMI categories, ethnicity, education, smoking pack years, smoking status, anemia status, diabetes status, congestive heart failure status, sleep apnea status, % predicted FEV<sub>1</sub>, and % predicted KCO. 95% CI: 95% confidence interval; CAT: COPD Assessment Test; SGRQ: St. George's Respiratory Questionnaire; SF-36: Short Form 36-item survey; 6MWD: six-minute walk distance; SpO<sub>2</sub> %: oxygen saturation

Online supplements are not copyedited prior to posting and the author(s) take full responsibility for the accuracy of all data.

**e-Table 4.** Percent Predicted KCO and FEV<sub>1</sub> associated with Exacerbations

| Outcome                | KCO % predicted     |         | FEV <sub>1</sub> % predicted |         |
|------------------------|---------------------|---------|------------------------------|---------|
|                        | Rate ratio (95% CI) | p-value | Rate ratio (95% CI)          | p-value |
| Any exacerbations      | 1.06 (1, 1.12)      | 0.054   | 1.23 (1.19, 1.28)            | <.001   |
| Moderate exacerbations | 1.04 (0.97, 1.14)   | 0.261   | 1.20 (1.16, 1.25)            | <.001   |
| Severe exacerbations   | 1.11 (1.05, 1.18)   | <0.001  | 1.30 (1.22, 1.39)            | <.001   |

Associations are per 10% decrease in percent predicted KCO or percent predicted FEV<sub>1</sub>. Exacerbation models (N=1806) include age, sex, ethnicity, BMI categories, education, pack years, smoking status, diabetes status, anemia status, congestive heart failure status, sleep apnea status, emphysema as a categorical variable (missing data, ≤5% LAA-950, >5% LAA-950), % predicted KCO, and % predicted FEV<sub>1</sub>. Any exacerbation refers to all episodes requiring antibiotics or steroids, moderate refers to only those episodes not resulting in an ER visit or hospitalization, and severe refers to those requiring an ER visit or hospitalization. 95% CI: 95% confidence interval

**e-Figure 1.** Scatterplot of DLCO and Percent Emphysema (%LAA-950)

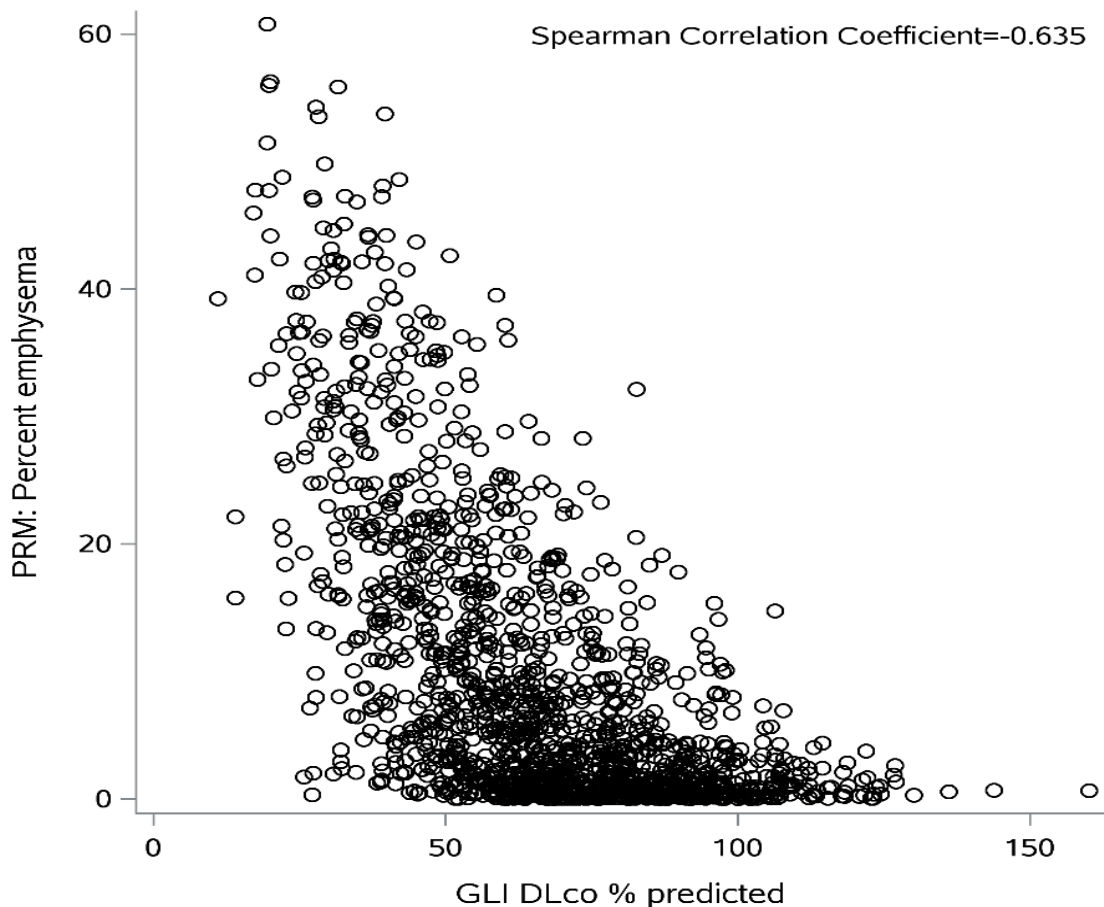

**e-Figure 2.** Association between severe reduction in DLCO and FEV<sub>1</sub> with Exacerbations

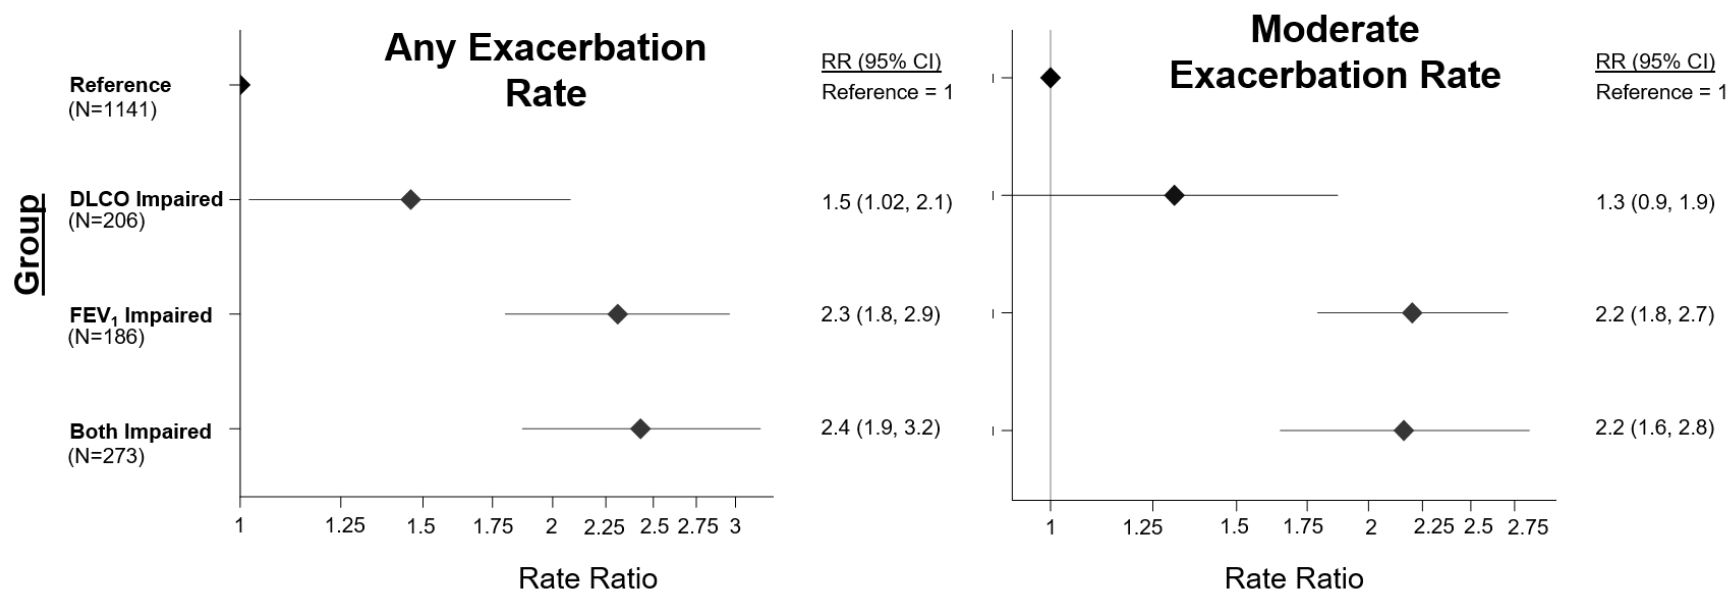

Association between categories of FEV<sub>1</sub> and DLCO and self-reported rate of exacerbations. Any exacerbation refers to all exacerbations requiring antibiotics or steroids. Moderate exacerbation refers to any exacerbation requiring antibiotics or steroids but did not result in hospitalization. Groups are defined as reference (FEV<sub>1</sub> and DLCO both >50% predicted), DLCO impaired (FEV<sub>1</sub> >50% and DLCO ≤50%), FEV<sub>1</sub> impaired (FEV<sub>1</sub> ≤50% and DLCO >50%), and both impaired (FEV<sub>1</sub> and DLCO ≤50%). Model is adjusted for age, sex, ethnicity, BMI categories, smoking pack years, anemia status, diabetes status, congestive heart failure status, sleep apnea status, and emphysema as a categorical variable (missing, ≤5% LAA-950, >5% LAA-950). *RR*: Rate Ratio; *95% CI*: 95% confidence interval
